# Supplementary material
Source: PubMed Central journal article supplement (PMC4968424)
Supplement: mmc1.pdf [file mmc1.pdf]

**Biophysical Journal, Volume 111**

**Supplemental Information**

**Noise-Induced Increase of Sensitivity in Bacterial Chemotaxis**

**Rui He, Rongjing Zhang, and Junhua Yuan**

# Noise-induced increase of sensitivity in bacterial chemotaxis

Rui He, Rongjing Zhang\* and Junhua Yuan\*

Hefei National Laboratory for Physical Sciences at the Microscale, and Department of Physics, University of Science and Technology of China, Hefei, Anhui, 230026, China

## Supporting material

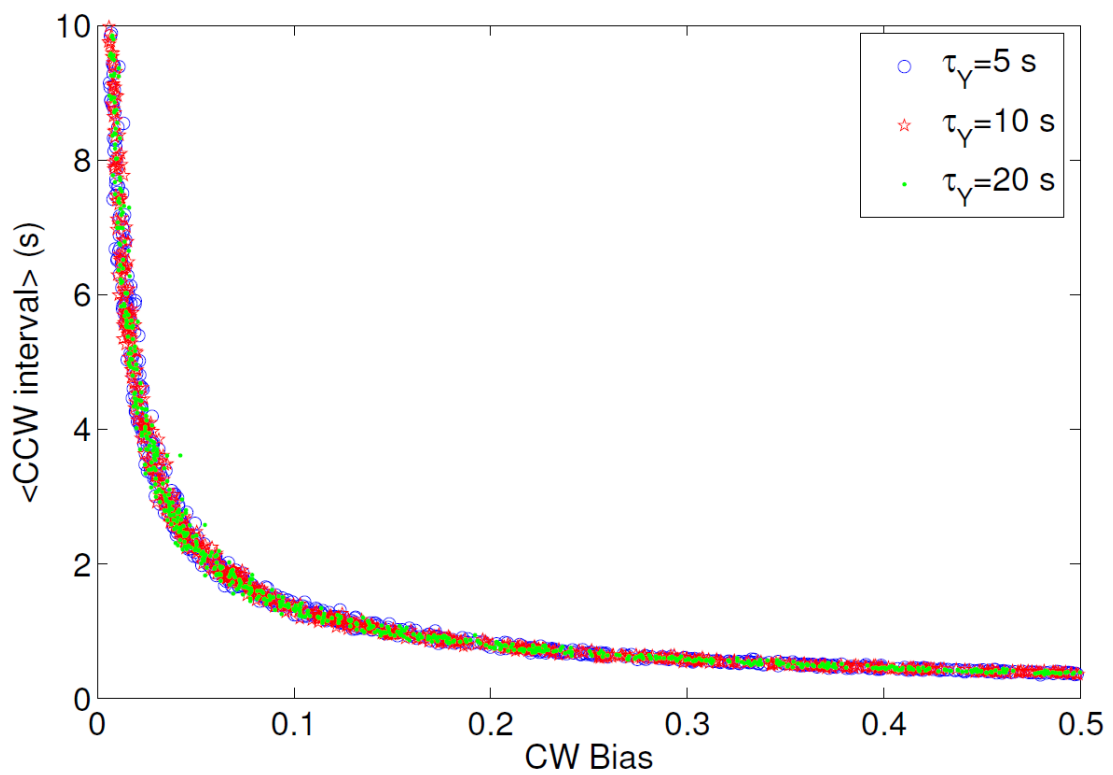

Fig. S1. The wild type <CCW interval> as a function of CW bias simulated with the Ising-type model using  $\sigma_Y$  of  $0.26 \mu\text{M}$  and three different values of  $\tau_Y$ : 5, 10, and 20 s.
